# Supplementary material for: Reproducibility and accuracy of non-contrast abbreviated magnetic resonance imaging of the liver in surveillance for early recurrence for hepatocellular carcinoma in a Western population: a multi-reader study
Source: Research Square preprint supplement (doi:10.21203/rs.3.rs-6306750/v1), 2025-04-21
Supplement: Supplementary file 1 [file f1a6e71ce980cb163f7c105c.pdf]

|                                           | Equipment      | Plane | TR/TE (ms)                   | Thickness (mm) | Flip angle |
|-------------------------------------------|----------------|-------|------------------------------|----------------|------------|
| <b>T1w-images in-phase; opposed phase</b> | 1.5 T scanners | Axial | 155–180 / 4.3–4.8; 2.02–2.37 | 5              | 70–80      |
|                                           | 3T scanner *   |       | 3.97 / 2.46–1.23             | 2              | 9          |
| <b>T2-SSFSE</b>                           | 1.5 T scanners | Axial | 916–1200 / 88–95             | 5              | 90–180     |
|                                           | 3T scanner     |       | 1000 / 94                    | 4.6            | 135        |
| <b>DWI</b>                                | 1.5 T scanners | Axial | 3200–15000 / 60–78.2         | 5              | 90         |
|                                           | 3T scanner     |       | 55 / 6100                    | 4.8            | 90         |
| <b>3DT1GE-FS**</b>                        | 1.5 T scanners | Axial | 4.1–4.5 / 1.9–2.2            | 2.2–3          | 10–12      |
|                                           | 3T scanner     |       | 3.97/1.23                    | 2              | 9          |

\*Dixon-vibe in/opp phases

\*\* Dynamic contrast-enhanced T1-weighted imaging included unenhanced and gadolinium-enhanced images acquired in the arterial ( $\approx 20$  s after contrast injection), portal venous (60–65 s after injection), and delayed venous phases (100–110 s after injection) in the axial plane. Unenhanced images were obtained using a 3D T1-weighted breath-hold fat-suppressed gradient-echo sequence. Dynamic contrast-enhanced images were acquired with a spoiled gradient-recalled echo sequence (VIBE or LAVA) before and after the administration of extracellular gadolinium (gadobutrol 1mmol/mL, Gadovist, Bayer Schering Pharma AG) using a power injector at 0.1 mL/kg body weight, undiluted at 2 mL/s followed by a 20 mL saline flush at the same rate.

**Supplementary Table 1.** Technical characteristics of liver MRI sequences.

Abbreviations: SSFSE: single-shot fast spin-echo; DWI: diffusion-weighted imaging; B values used for DWI were 50–400–800 for Aera Siemens and 0–600 for GE. 3DT1GE-FS: 3D T1-weighted gradient-echo with fat suppression.

|                               | <b>Gwet's AC1 (95%CI)</b> |
|-------------------------------|---------------------------|
| <b>Local Recurrence</b>       | 0.86 (0.83–0.88)          |
| <b>NIH Recurrence</b>         | 0.58 (0.53–0.63)          |
| <b>Any Type of Recurrence</b> | 0.48 (0.43–0.53)          |

**Supplementary Table 2.** Intra-reader agreement for HCC recurrence.

Abbreviations: NIH: new intrahepatic; CI: confidence interval.

| Type of recurrence      | Protocol | Overall Reported Observations present |
|-------------------------|----------|---------------------------------------|
| Local recurrence        | AMRI     | 90                                    |
|                         | CMRI     | 122                                   |
| New intrahepatic lesion | AMRI     | 105                                   |
|                         | CMRI     | 354                                   |
| Any-type recurrence     | AMRI     | 190                                   |
|                         | CMRI     | 438                                   |

**Supplementary Table 3.** Pooled observations reported by all readers, by type of recurrence in each Magnetic Resonance set

Abbreviations: AMRI: Abbreviated non-contrast MRI; CMRI: conventional liver MRI

| AMRI   | Local Recurrence            |       |             |        |                        |                    |        |                        |
|--------|-----------------------------|-------|-------------|--------|------------------------|--------------------|--------|------------------------|
|        | Yes (True positive)         |       |             |        |                        | No (True negative) |        |                        |
|        | Group                       | Class | Experienced |        | McNemar test (p-value) | Experienced        |        | McNemar test (p-value) |
| Yes    |                             |       | No          | Yes    |                        | No                 |        |                        |
|        | Novice                      | Yes   | 10          | 6      | 0.1573                 | 10                 | 25     | 0.2170                 |
|        |                             | No    | 2           | 46     |                        | 17                 | 456    |                        |
|        | New Intrahepatic Recurrence |       |             |        |                        |                    |        |                        |
|        | Yes (True positive)         |       |             |        |                        | No (True negative) |        |                        |
|        | Group                       | Class | Experienced |        | McNemar test (p-value) | Experienced        |        | McNemar test (p-value) |
|        |                             |       | Yes         | No     |                        | Yes                | No     |                        |
|        | Novice                      | Yes   | 20          | 9      | 0.8084                 | 6                  | 27     | 0.0027                 |
|        |                             | No    | 8           | 63     |                        | 9                  | 430    |                        |
|        | Any type Recurrence         |       |             |        |                        |                    |        |                        |
|        | Yes (True positive)         |       |             |        |                        | No (True negative) |        |                        |
|        | Group                       | Class | Experienced |        | McNemar test (p-value) | Experienced        |        | McNemar test (p-value) |
|        |                             |       | Yes         | No     |                        | Yes                | No     |                        |
| Novice | Yes                         | 44    | 8           | 0.0343 | 14                     | 29                 | 0.1086 |                        |
|        | No                          | 19    | 77          |        | 18                     | 363                |        |                        |
| CMRI   | Local Recurrence            |       |             |        |                        |                    |        |                        |
|        | Yes (True positive)         |       |             |        |                        | No (True negative) |        |                        |
|        | Group                       | Class | Experienced |        | McNemar test (p-value) | Experienced        |        | McNemar test (p-value) |
| Yes    |                             |       | No          | Yes    |                        | No                 |        |                        |

|                             |       |      |    |                        |      |     |                        |
|-----------------------------|-------|------|----|------------------------|------|-----|------------------------|
| Novice                      | Yes   | 17   | 16 | 0.0606                 | 18   | 14  | <0.0001                |
|                             | No    | 7    | 24 |                        | 15   | 461 |                        |
| New Intrahepatic Recurrence |       |      |    |                        |      |     |                        |
| Yes (True positive)         |       |      |    | No (True negative)     |      |     |                        |
| Group                       | Class | CMRI |    | McNemar test (p-value) | CMRI |     | McNemar test (p-value) |
|                             |       | Yes  | No |                        | Yes  | No  |                        |
| Novice                      | Yes   | 73   | 4  | 0.1088                 | 54   | 21  | <0.0001                |
|                             | No    | 10   | 13 |                        | 65   | 332 |                        |
| Any type Recurrence         |       |      |    |                        |      |     |                        |
| Yes (True positive)         |       |      |    | No (True negative)     |      |     |                        |
| Group                       | Class | CMRI |    | McNemar test (p-value) | CMRI |     | McNemar test (p-value) |
|                             |       | Yes  | No |                        | Yes  | No  |                        |
| Novice                      | Yes   | 111  | 15 | 0.2207                 | 63   | 15  | <0.0001                |
|                             | No    | 9    | 13 |                        | 51   | 295 |                        |

**Supplementary Table 4.** Comparison of sensitivities (true positive) and specificities (true negatives) between novice and expert readers for non-contrast MRI and standard contrast-enhanced liver MRI.

Abbreviations: AMRI: abbreviated magnetic resonance imaging; CMRI: contrast-enhanced magnetic resonance imaging

## Round 1

| To increase the reader's confidence in categorizing an AMRI as positive, the number of sequences where the observation should be identified is | Median |
|------------------------------------------------------------------------------------------------------------------------------------------------|--------|
| 1                                                                                                                                              | 2      |
| 2                                                                                                                                              | 6      |
| >2                                                                                                                                             | 9      |
| The interpretation of AMRI as positive for the detection of tumor recurrence should be limited to lesions with a size of:                      |        |
| Any size                                                                                                                                       | 3      |
| 10 mm or greater                                                                                                                               | 8      |
| 15 mm or greater                                                                                                                               | 6      |
| 20 mm or greater                                                                                                                               | 5      |
| Size of observations does not influence observation detection                                                                                  | 1      |
| Size of observations does influence on observation detection on:                                                                               |        |
| AMRI                                                                                                                                           | 9      |
| DWI only                                                                                                                                       | 6      |
| T2 only                                                                                                                                        | 6      |
| T1-GE only                                                                                                                                     | 6      |
| The technical quality of the T2 sequence is not optimal in images from a 1.5T scanner.                                                         | 4      |
| The technical quality of the T1-GE fat-sat sequence is not optimal in images from a 1.5T scanner.                                              | 2      |
| The technical quality of the DWI sequence is not optimal in images from a 1.5T scanner.                                                        | 5      |
| For the detection of tumor recurrence, 3T equipment should be used in the AMRI protocols.                                                      | 7      |
| In highly heterogeneous livers, DWI image quality is not optimal.                                                                              | 7      |

|                                                                                                              |   |
|--------------------------------------------------------------------------------------------------------------|---|
| In highly heterogeneous livers, T2 image quality is not optimal.                                             | 7 |
| In highly heterogeneous livers, T1-GE image quality is not optimal.                                          | 6 |
| <b>Lack of contrast-enhanced sequences reduces the confidence of radiologists in detecting observations:</b> |   |
| Only in less-experienced radiologists                                                                        | 2 |
| Only in more-experienced radiologists                                                                        | 3 |
| In all radiologists regardless of experience                                                                 | 9 |

## ROUND 2

| Question                                                                                                                                       | Dispersion |
|------------------------------------------------------------------------------------------------------------------------------------------------|------------|
| To increase the reader's confidence in categorizing an AMRI as positive, the number of sequences where the observation should be identified is |            |
| 1                                                                                                                                              | No         |
| >2                                                                                                                                             | No         |
| <b>The interpretation of AMRI as positive for the detection of tumor recurrence should be limited to lesions with a size of:</b>               |            |
| 10 mm or greater                                                                                                                               | Yes        |
| Size of observations does not influence observation detection                                                                                  | No         |
| <b>Size of observations does influence on observation detection on:</b>                                                                        |            |
| AMRI                                                                                                                                           | No         |
| The technical quality of the T1-GE fat-sat sequence is not optimal in images from a 1.5T scanner.                                              | Yes        |
| For the detection of tumor recurrence, 3T equipment should be used in the AMRI protocols.                                                      | Yes        |
| In highly heterogeneous livers, DWI image quality is not optimal.                                                                              | No         |

|                                                                                                              |     |
|--------------------------------------------------------------------------------------------------------------|-----|
| In highly heterogeneous livers, T2 image quality is not optimal.                                             | No  |
| <b>Lack of contrast-enhanced sequences reduces the confidence of radiologists in detecting observations:</b> |     |
| Only in less-experienced radiologists                                                                        | Yes |
| Only in more-experienced radiologists                                                                        | Yes |
| In all radiologists regardless of experience                                                                 | No  |

### ROUND 3

| Question                                                                                                                                       | Appropriateness |
|------------------------------------------------------------------------------------------------------------------------------------------------|-----------------|
| To increase the reader's confidence in categorizing an AMRI as positive, the number of sequences where the observation should be identified is |                 |
| 1                                                                                                                                              | Inappropriate   |
| >2                                                                                                                                             | Appropriate     |
| <b>The interpretation of AMRI as positive for the detection of tumor recurrence should be limited to lesions with a size of:</b>               |                 |
| Size of observations does not influence observation detection                                                                                  | Inappropriate   |
| <b>Size of observations does influence on observation detection on:</b>                                                                        |                 |
| AMRI                                                                                                                                           | Appropriate     |
| In highly heterogeneous livers, DWI image quality is not optimal.                                                                              | Appropriate     |
| In highly heterogeneous livers, T2 image quality is not optimal.                                                                               | Appropriate     |
| <b>Lack of contrast-enhanced sequences reduces the confidence of radiologists in detecting observations:</b>                                   |                 |
| In all radiologists regardless of experience                                                                                                   | Appropriate     |



**Supplementary Table 5.** Select consensus sources of disagreement and for improvement of AMRI detection of HCC recurrence and inter-observer reliability. The selection of consensus statements was based on a two-step selection based on appropriateness and level of disagreement. In the first round of selection, statements that achieved a median of 1-3 or 7-9 would be appropriate in a positive or negative direction and would be retained as recommendations. In the second round of selection, we focused on the level of disagreement. Disagreement was considered present when  $\geq 2$  panelists rated appropriateness at different extremes of the scale (1-3 and 7-9).

First round Table: Gold (selected for 1<sup>st</sup> round): Median 7–9 or Median 1-3; Grey (excluded): Median 4–6;

Second round Table: Gold (selected for 2<sup>st</sup> round): No dispersion; Grey (excluded): dispersion

The depicted interquartile range is a measure of statistical dispersion

The round 3 Table is the final selection of statements.
